# Supplementary material
Source: PubMed Central journal article supplement (PMC11027693)
Supplement: 262_2020_2598_MOESM1_ESM.pdf [file 262_2020_2598_MOESM1_ESM.pdf]

Supplementary Material

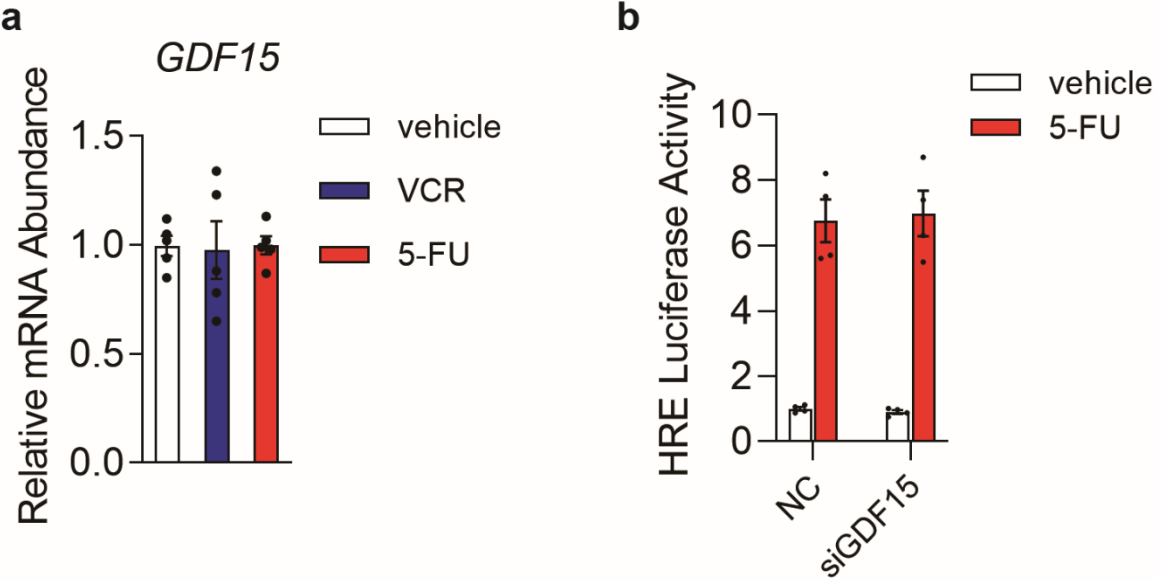

Fig. S1 Tumor cells don't express higher GDF15 in response to chemo drugs treatment. **a** qRT-PCR analysis of *GDF15* mRNA levels of AGS cells in the presence of 5-FU, VCR or vehicle control for 24 hours. **b** Luciferase activities were determined in AGS cells. The cells were transfected with siRNA targeted GDF15 (siGDF15) or negative control prior to 5-FU or vehicle treatment. All data are shown as mean ± s.e.m..

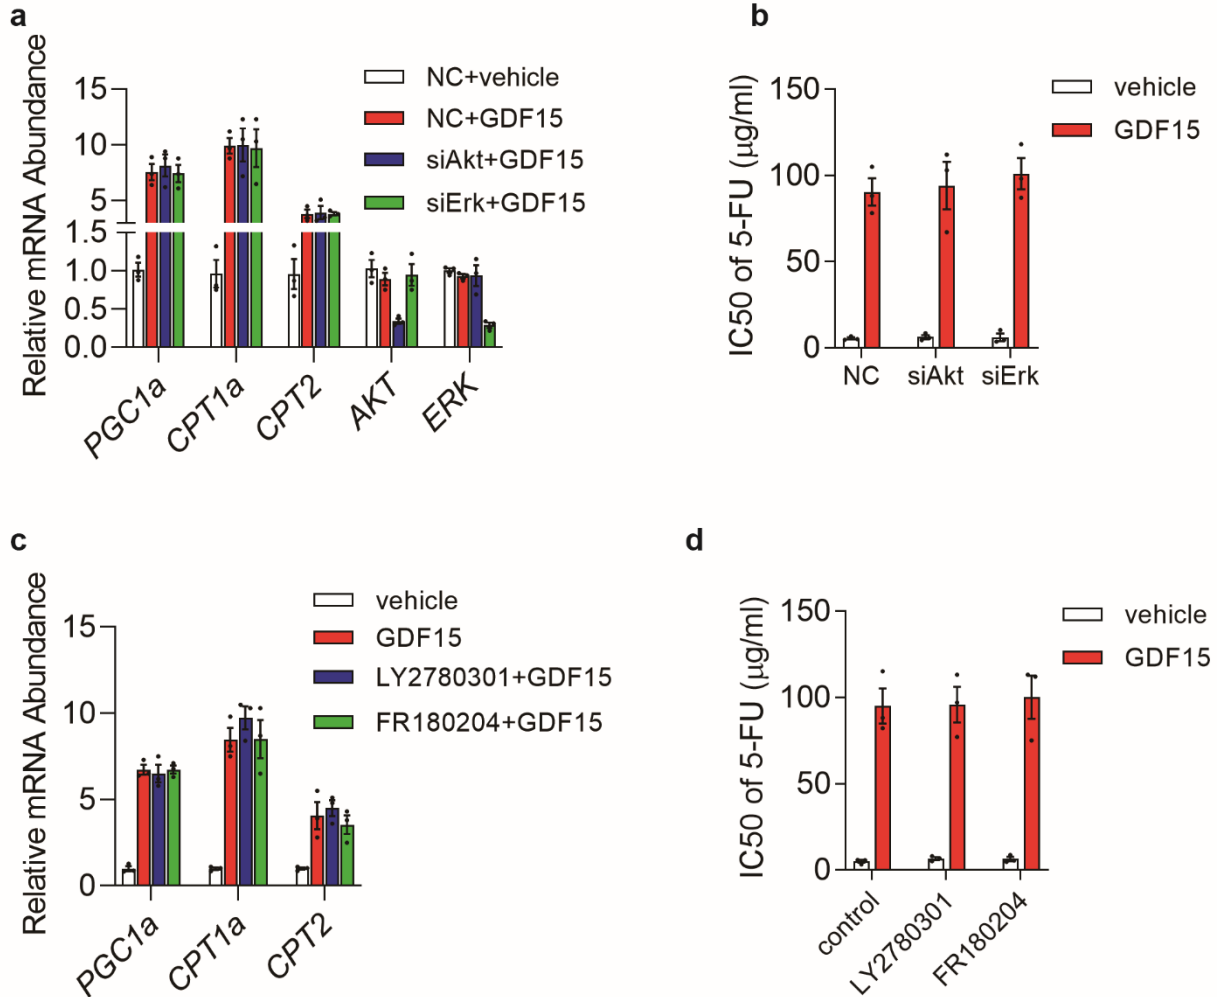

Fig.S2 The impacts of GDF15 on FAO and chemoresistance of tumor cells are independent on AKT and ERK pathways.

**a-b**, The AGS cells were treated with siRNA treated *Akt* (siAkt), *Erk* (siErk) or negative control (NC) prior to the treatment of GDF15 or vehicle, respectively. **a** qRT-PCR analysis of mRNA levels of indicated genes. **b** IC-50 of 5-FU were determined in AGS cells. **c-d**, The AGS cells were treated with LY2780301 (2 µM) or FR180204 (10 µM) in the combination with GDF15 or vehicle, respectively. **c** qRT-PCR analysis of mRNA levels of indicated genes in AGS cells. **d** IC-50 determined in AGS cells. All data are shown as mean ± s.e.m..
